# Supplementary material
Source: PubMed Central journal article supplement (PMC7718421)
Supplement: NIHMS1630002-supplement-sup_01.pdf [file NIHMS1630002-supplement-sup_01.pdf]

|                             | <b>Patient 1</b>                                                         |               | <b>Patient 2</b>                                                                            |                  |
|-----------------------------|--------------------------------------------------------------------------|---------------|---------------------------------------------------------------------------------------------|------------------|
| <b>Description</b>          | 37-year-old male with a history of congenital pulmonary artery stenosis. |               | 80-year-old male with coronary artery disease and premature ventricular contraction burden. |                  |
| <b>Scanner</b>              | MAGNETOM Sola (1.5T)                                                     |               |                                                                                             |                  |
|                             | <b>SG 4D Flow</b>                                                        | <b>2D-PC*</b> | <b>SG 4D Flow</b>                                                                           | <b>2D-PC</b>     |
| <b>FOV [mm]</b>             |                                                                          |               |                                                                                             |                  |
| <i>Frequency</i>            | 300                                                                      | 380           | 320                                                                                         | 380              |
| <i>Phase</i>                | 300                                                                      | 285           | 320                                                                                         | 285              |
| <i>Slice</i>                | 179                                                                      | N/A           | 185                                                                                         | N/A              |
| <b>Spatial Res. [mm]</b>    |                                                                          |               |                                                                                             |                  |
| <i>Frequency</i>            | 3.1                                                                      | 2.0           | 3.3                                                                                         | 2.0              |
| <i>Phase</i>                | 3.1                                                                      | 2.9           | 3.3                                                                                         | 2.9              |
| <i>Slice</i>                | 3.2                                                                      | 6.0           | 3.3                                                                                         | 6.0              |
| <b>Temporal Res. [ms]</b>   | 45 <sup>†</sup>                                                          | 42            | 65 <sup>†</sup>                                                                             | 118 <sup>△</sup> |
| <b>TE [ms]</b>              | 2.5                                                                      | 2.3           | 2.6                                                                                         | 2.3              |
| <b>TR [ms]</b>              | 4.4                                                                      | 4.2           | 4.6                                                                                         | 4.2              |
| <b>Flip Angle [degrees]</b> | 7                                                                        | 15            | 7                                                                                           | 15               |
| <b>Receiver BW [Hz/px]</b>  | 801                                                                      | 501           | 801                                                                                         | 501              |
| <b>VENC [cm/s]</b>          | 200                                                                      | 150 – 200     | 300                                                                                         | 150              |
| <b>Respiratory Eff. [%]</b> | 50 <sup>†</sup>                                                          | Breath-held   | 50 <sup>†</sup>                                                                             | Breath-held      |
| <b>Acquisition Time</b>     | 5 min                                                                    | 8 – 9 s       | 5 min                                                                                       | 12 s             |
| <b>Acceleration Rate</b>    | 23 <sup>†</sup>                                                          | GRAPPA, 2     | 26 <sup>†</sup>                                                                             | GRAPPA, 2        |

Supporting Information Table S1: MR acquisition parameters used in the patient study for the proposed self-gated 4D flow (SG 4D Flow) and conventional 2D phase-contrast (2D-PC) protocols. \*Ranges indicate minimum and maximum values from the aggregate of all vessels imaged. <sup>†</sup>Values were determined retrospectively after data acquisition. <sup>△</sup>A lower temporal resolution was used to avoid corruption by cardiac arrhythmia in this patient. The images were, however, reconstructed on a temporal grid with 20 cardiac bins.

Supporting Information Video S1: Pathline video rendering of four anatomical views reformatted after ReVEAL4D reconstruction using the proposed self-gating pipeline in a healthy subject. Views are (A) left-ventricular outflow tract, (B) right-ventricular outflow tract, (C) three-vessel view oriented in a transverse plane, and (D) four-chamber view.

Supporting Information Video S2: Volumetric pathline rendering of the whole-heart after ReVEAL4D reconstruction using the proposed self-gating pipeline in one healthy subject. Renderings are displayed as follows: (A) apex oriented towards the camera, (B) apex oriented away from the camera, (C) transverse orientation at the level of the main pulmonary artery, and (D) rotation along the transverse axis.
